# Supplementary material for: The Necrotroph Botrytis cinerea BcSpd1 Plays a Key Role in Modulating Both Fungal Pathogenic Factors and Plant Disease Development
Source: Front Plant Sci. 2022 Jun 30;13:820767. doi: 10.3389/fpls.2022.820767 (PMC9280406; doi:10.3389/fpls.2022.820767)
Supplement: Supplementary File 3 — Differentially expressed genes involved in plant hormones signal transduction among CK, B05.10, and ΔBcSpd1 treated Col-0 plants. [file Data_Sheet_4.XLSX]

## Sheet: Sheet1
gene_id	Description	FPKM.CK Avr	FPKM.B0510 Avr	FPKM.BmSpd1 Avr
AT1G04250	AUX/IAA transcriptional regulator family protein	4.32175	1.87632	2.42612
AT1G04550	AUX/IAA transcriptional regulator family protein	8.22444	3.96549	6.47646
AT5G54510	Auxin-responsive GH3 family protein	1.63199	0.597289	1.16459
AT1G68810	basic helix-loop-helix (bHLH) DNA-binding superfamily protein	6.79273	3.26691	3.67761
AT4G09180	basic helix-loop-helix (bHLH) DNA-binding superfamily protein	5.50042	2.6404	3.8419
AT5G10570	basic helix-loop-helix (bHLH) DNA-binding superfamily protein	2.22301	0.763517	1.07603
AT4G31050	Biotin/lipoate A/B protein ligase family	6.36565	2.89527	4.10193
AT1G19350	Brassinosteroid signalling positive regulator (BZR1) family protein	72.8522	35.4698	44.0883
AT4G34160	CYCLIN D3;1	3.91178	1.87712	2.47928
AT3G50070	CYCLIN D3;3	2.47318	1.22096	1.71891
AT1G68740	EXS (ERD1/XPR1/SYG1) family protein	0.569873	0.200212	0.413918
AT4G00150	GRAS family transcription factor	8.03536	3.14426	4.41667
AT5G35750	histidine kinase 2	7.42972	3.65026	3.97831
AT2G22670	indoleacetic acid-induced protein 8	45.7217	22.2894	22.9459
AT2G46970	phytochrome interacting factor 3-like 1	3.33188	1.3204	1.75699
AT5G59010	Protein kinase protein with tetratricopeptide repeat domain	5.33336	2.41439	4.21523
AT2G40670	response regulator 16	3.17491	1.04384	1.36383
AT3G57040	response regulator 9	23.3765	8.19391	13.0034
AT2G21210	SAUR-like auxin-responsive protein family	27.0079	12.934	43.1232
AT3G03820	SAUR-like auxin-responsive protein family	9.09811	1.76788	2.74329
AT3G03840	SAUR-like auxin-responsive protein family	2.11492	0.414636	0.649918
AT4G38850	SAUR-like auxin-responsive protein family	10.2028	3.44444	5.94021
AT4G38860	SAUR-like auxin-responsive protein family	62.9044	24.002	41.9212
AT3G04580	Signal transduction histidine kinase, hybrid-type, ethylene sensor	3.53393	7.14201	6.59448
AT2G33860	Transcriptional factor B3 family protein / auxin-responsive factor AUX/IAA-related	7.84465	3.42306	4.39786
AT5G26230		1.87181	0.454176	0.971421
